# Supplementary material for: Evaluating Potential Cetacean Welfare Indicators from Video of Live Stranded Long-Finned Pilot Whales (Globicephala melas edwardii)
Source: MDPI journal article supplement (doi:10.3390/ani12141861), 2022-07-21
Supplement: s1 [file s1]

# Supplementary Materials

## Evaluating potential cetacean welfare indicators from video of live stranded long-finned pilot whales (*Globicephala melas edwardii*)

Table S1. Stranding events (n=14) and details of video footage collected of individual live cetaceans (n=53) of four odontocete species between August 2010 and March 2022, New Zealand. Only pilot whale data were used in analyses, with data from other species providing ground-truthing to identified behavioural indicators. In the case of mass strandings, footage may have included multiple individuals, however the video length noted included only the focal animal. \*Note three animals were filmed both cranio-laterally and laterally.

| Year         | Location     | Species                 | Stranding type | No. animals filmed | Video length (mins) | Source     | Filming equipment | No. filmed cranio-laterally | No. filmed laterally |
|--------------|--------------|-------------------------|----------------|--------------------|---------------------|------------|-------------------|-----------------------------|----------------------|
| 2010         | Northland    | Long-finned pilot whale | Mass           | 1                  | 0.5                 | Public     | Video camera      | 1                           | 0                    |
| 2011         | Golden Bay   | Long-finned pilot whale | Mass           | 2                  | 0.8                 | Public     | Phone             | 0                           | 2                    |
| 2014         | Golden Bay   | Long-finned pilot whale | Mass           | 1                  | 0.3                 | Public     | Phone             | 1                           | 0                    |
| 2015         | Golden Bay   | Long-finned pilot whale | Mass           | 20                 | 11.3                | Public     | GoPro             | 4                           | 16                   |
| 2017         | Golden Bay   | Long-finned pilot whale | Mass           | 5                  | 1.2                 | Public     | GoPro             | 4                           | 1                    |
| 2020         | Waipu        | Pygmy killer whale      | Mass           | 2                  | 294.4               | Researcher | GoPro             | 2                           | 0                    |
| 2020         | Whanganui    | Long-finned pilot whale | Single         | 1                  | 37.4                | DOC        | Phone             | 1*                          | 1*                   |
| 2020         | Coromandel   | Long-finned pilot whale | Mass           | 2                  | 2.9                 | Public     | Phone             | 0                           | 2                    |
| 2020         | Raglan       | Cuvier's beaked whale   | Single         | 1                  | 33.1                | DOC        | Phone             | 1                           | 0                    |
| 2021         | Ruakaka      | Grey's beaked whale     | Mass           | 1                  | 6.2                 | Public     | Phone             | 0                           | 1                    |
| 2021         | Golden Bay   | Long-finned pilot whale | Mass           | 11                 | 5.9                 | Public     | GoPro             | 4                           | 7                    |
| 2021         | Taranaki     | Long-finned pilot whale | Mass           | 1                  | 15.4                | Public     | Phone             | 1*                          | 1*                   |
| 2021         | Christchurch | Long-finned pilot whale | Single         | 1                  | 4.1                 | DOC        | Phone             | 1*                          | 1*                   |
| 2022         | Golden Bay   | Long-finned pilot whale | Mass           | 4                  | 13.8                | Public     | Phone             | 4                           | 0                    |
| <b>Total</b> |              |                         |                | <b>53</b>          | <b>427.2</b>        |            |                   | <b>24*</b>                  | <b>32*</b>           |

Table S2. Ethogram of stranded odontocete behaviour derived from video observations of 53 focal individuals (4 species, 14 stranding events) on the New Zealand coast between August 2010 and March 2022. Two physiological parameters are included. Note: behaviours displayed only by pilot whales\*\* vs those not displayed by pilot whales\*.

| Body location | Type  | Behaviour                  | Description                                                                                             |
|---------------|-------|----------------------------|---------------------------------------------------------------------------------------------------------|
| Blowhole      | Point | Blowhole twitch            | Blowhole makes small muscular twitching movement                                                        |
| Blowhole      | Point | Water from blowhole        | Small amount of water expelled from blowhole without respiration                                        |
| Blowhole      | Point | Open-close blowhole**      | Blowhole opens and closes but there is no movement of thorax indicating that respiration does not occur |
| Fin           | State | Dorsal fin flutter         | Dorsal fin makes small lateral shaking/tremor type movements                                            |
| Fin           | State | Pec fin flutter L          | Pectoral fin left flutters in small shaking/tremor type movements dorso-ventrally                       |
| Fin           | State | Pec fin flutter R          | Pectoral fin right flutters in small shaking/tremor type movements dorso-ventrally                      |
| Fin           | State | Tail flutter               | Tail fluke flutters, small shaking/tremor type movements dorso-ventrally without lifting peduncle       |
| Fin           | State | Pec joint moves**          | Joint of pectoral fin rotates anterior or posterior without lifting pectoral fin                        |
| Head          | State | Head arch*                 | Head and thorax are lifted high off the ground into a curved arch                                       |
| Head          | State | Head lift                  | Head is lifted slightly off the ground without moving the thorax                                        |
| Head          | State | Head side-to-side          | Head moves from side to side laterally                                                                  |
| Head          | State | Mouth open                 | Animal opens its mouth and closes it again                                                              |
| Head          | Point | Movement in lower jaw      | Small twitching type muscular movement in lower jaw/throat as if swallowing                             |
| Head          | Point | Nuchal pad twitch**        | Muscle twitch in nuchal fat pad behind the blowhole                                                     |
| Head          | Point | Head-pec fin jerk/flinch** | Anterior part of body from pectoral fin to the head jerks/flinches suddenly to one side                 |
| Head          | State | Eye open L**               | Left eye is open continuously                                                                           |
| Head          | State | Eye open R**               | Right eye is open continuously                                                                          |
| Melon         | State | Vocalisation**             | Animal audibly vocalises                                                                                |

|            |       |                                  |                                                                                                          |
|------------|-------|----------------------------------|----------------------------------------------------------------------------------------------------------|
| Posture    | State | Dorsal recumbency**              | Animal is lying on its dorsal (back) surface                                                             |
| Posture    | State | Lateral recumbency               | Animal is lying on its side (lateral)                                                                    |
| Posture    | State | Ventral recumbency               | Animal is lying on its ventrum (underside)                                                               |
| Tail       | State | Tail arch                        | Tail fluke and entire peduncle are lifted high off the ground into a curved arch                         |
| Tail       | State | Tail hover                       | Tail is lifted slightly off ground and remains there hovering                                            |
| Tail       | State | Tail lift                        | Tail fluke and caudal peduncle lift slightly off the ground                                              |
| Tail       | State | Tail side-to-side                | Tail moves from side to side (lateral)                                                                   |
| Tail       | State | Tail fluke slapping**            | Animal slaps fluke up and down (dorso-ventral) on ground quickly and vigorously without lifting peduncle |
| Whole body | State | Body rocking                     | Entire body rocks laterally side to side                                                                 |
| Whole body | State | Body tenses                      | Entire body girth appears to expand without respiration, possibly tensing all muscles                    |
| Whole body | State | Body tremble                     | Whole body trembles/shakes                                                                               |
| Whole body | State | Whole body arching/<br>thrashing | Entire body thrashes/arches vigorously dorso-ventrally                                                   |
| Thorax     | Point | Heartbeat**                      | Visible heartbeat close to left pectoral fin insertion on the ventrum                                    |
| Thorax     | Point | Respiration                      | Animal's thorax expands, blowhole opens, and audible explosive exhalation and inhalation occurs          |

Table S3. Types of human intervention that occurred with individual focal stranded cetaceans (n=53; 4 species across 14 stranding events) on the New Zealand coast between August 2010 and March 2022.

| <b>Intervention</b>   | <b>Description of intervention</b>                                                                  |
|-----------------------|-----------------------------------------------------------------------------------------------------|
| Present               | Human within ~2m of individual focal stranded cetacean but not touching it                          |
| Watering              | Human pours water onto cetacean                                                                     |
| Touching              | Human places hands on cetacean but is not trying to move it                                         |
| Digging               | Human digs out sand from around cetacean but has no direct contact                                  |
| Rolling               | Human rolls cetacean laterally (direct contact always occurs with rolling)                          |
| Noise                 | Noise caused by humans (other than normal talking) within ~2m of individual focal stranded cetacean |
| Holds dorsal fin      | Human holds onto dorsal fin of cetacean using hands                                                 |
| Dog present           | Canine is within ~2m of individual focal stranded cetacean but has no direct contact                |
| Reflex test           | Human performs reflex tests (palpebral, eyes or blowhole) on cetacean                               |
| Places block by sides | Human places wooden blocks or similar each lateral side of cetacean to prevent movement             |
| Places sand by sides  | Human builds sand wall at lateral sides of cetacean to prevent rolling                              |
| Holds peduncle        | Human encircles peduncle of cetacean using arm                                                      |
| Rubbing               | Human uses cloth to rub skin of focal stranded cetacean                                             |

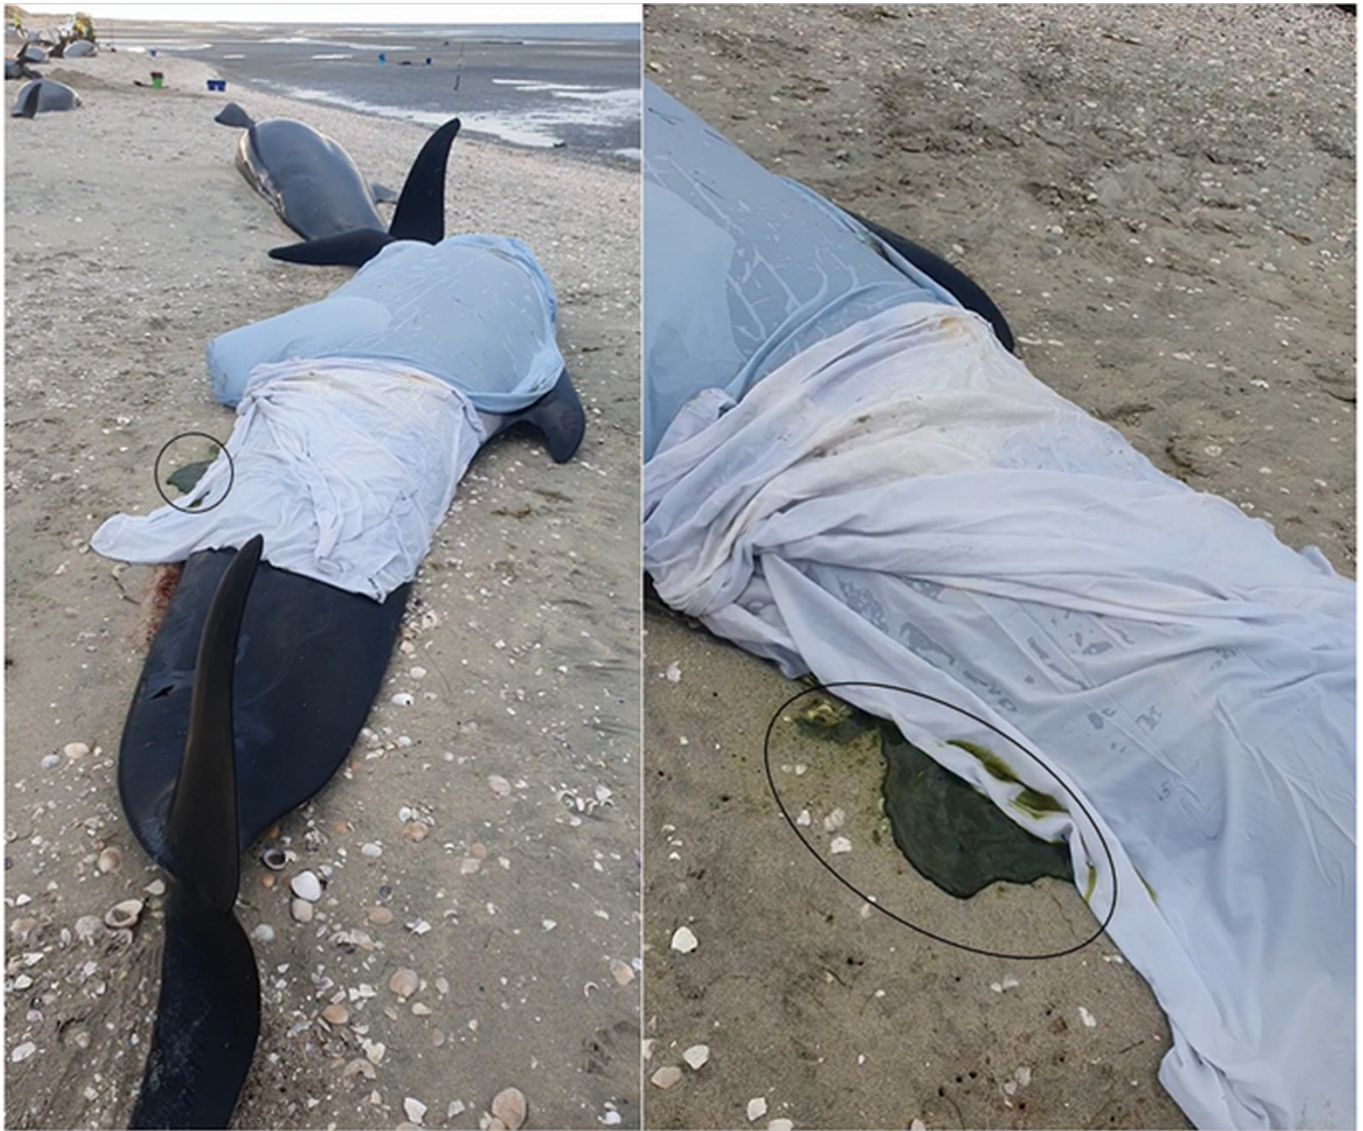

Figure S1. Observation of dark green liquid (within black ovals) defecated from live-stranded long-finned pilot whale. Photo credit: Rob Leenheer.



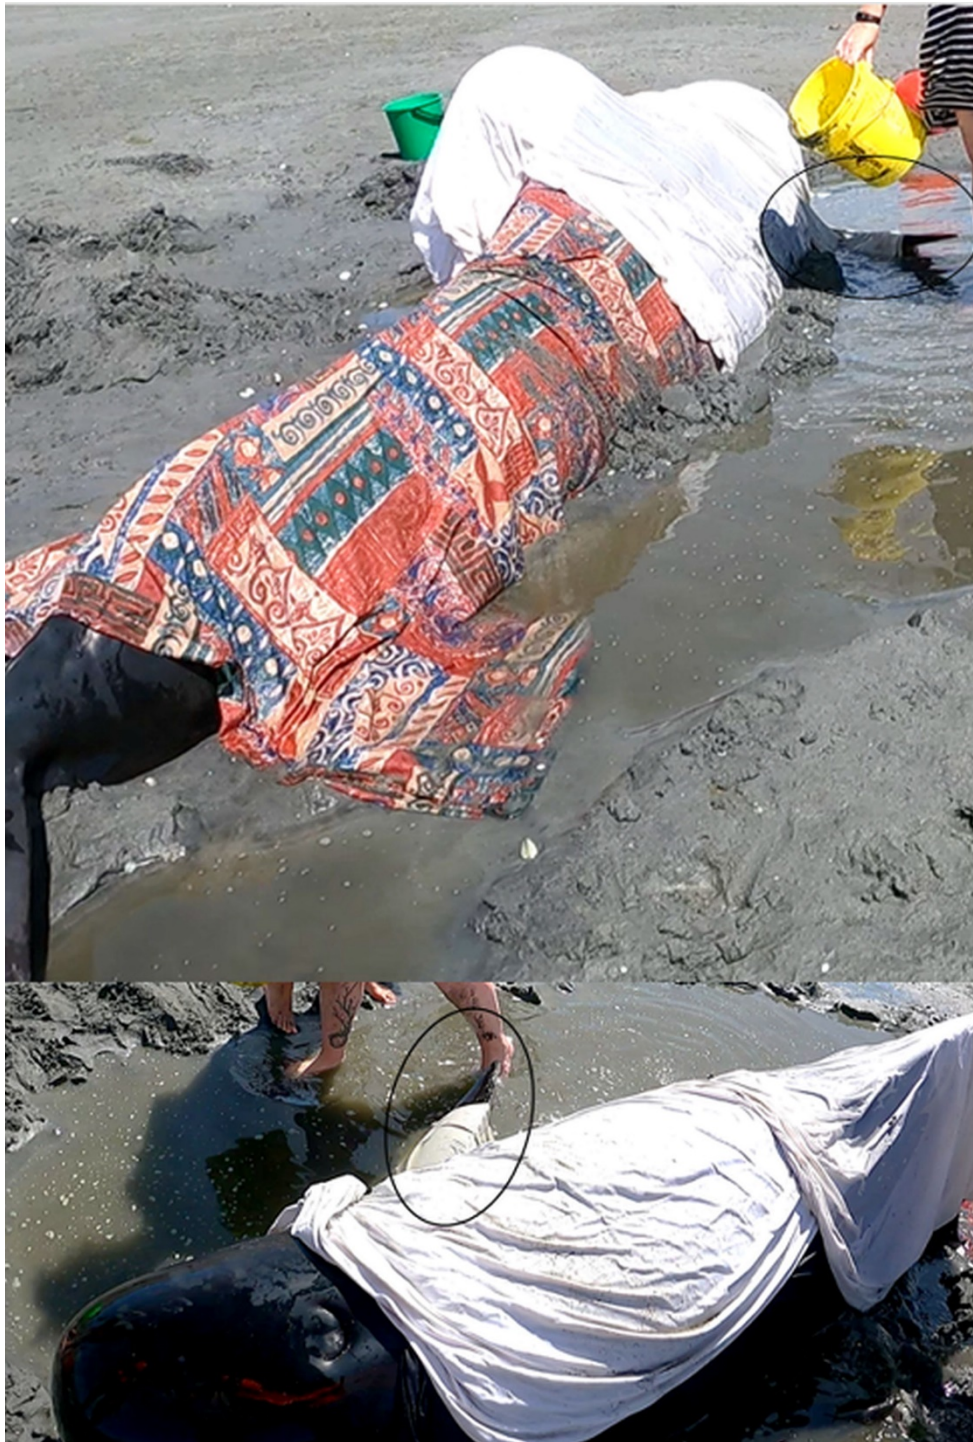

Figure S2. Observation of pectoral fin oriented laterally and superior to dorsal plane (within black ovals) in live stranded long-finned pilot whale. Photo credit: Kyle Mulinder.
